# Supplementary material for: Nitrene formation is the first step of the thermal and photochemical decomposition reactions of organic azides
Source: Royal Society of Chemistry journal article supplement (doi:10.1039/d1cp05785e), 2022-01-01
Supplement: d1cp05785e1.pdf [file d1cp05785e1.pdf]

# PHYSICAL CHEMISTRY

# CHEMICAL PHYSICS

Electronic Supplementary Information

**Nitrene formation is the first step of the thermal and  
photochemical decomposition reactions of organic azides**

by

Juan Soto, Manuel Algarra and Daniel Peláez

## CONTENTS

- Table S1 .....Vertical excitation (VE) energies in eV of the singlet and triplet states of isopropyl azide ( $C_s$ , MS-CASPT2/CASSCF(14,12)/ANO-RCC).
- Table S2 .....Vertical excitation (VE) energies in eV of the singlet and triplet states of isopropyl azide ( $C_s$ , MS-CASPT2/CASSCF(16,14)/ANO-R).
- Table S3 .....Vertical excitation (VE) energies in eV of the singlet and triplet states of isopropyl azide ( $C_s$ , MS-CASPT2/ CASSCF(14,12)/ANO-R).<sup>a,b</sup>
- Table S4 .....Internal coordinates of the species represented in Figure 3. CASSCF(16,14)/ANO-RCC.
- Table S5 .....Internal coordinates of the species represented in Figure 3. CASSCF(16,14)/ANO-R.
- Table S6 .....Internal coordinates of the species represented in Figure 3. CASSCF(14,12)/ANO-RCC.
- Table S7 .....Internal coordinates of the species represented in Figure 3. CASSCF(14,12)/ANO-R.
- Table S8 .....Internal coordinates of the nitrene species represented in Figure 3.
- Table S9 .....Set of nonredundant internal coordinates of isopropyl azide.
- Table S10a .....Assignment of the calculated fundamental modes of TS1.
- Table S10b .....Assignment of the calculated fundamental modes of TSx.
- Fig. S1 ..... Intrinsic reaction coordinate connecting reactant and products via the transition state **TSx**. IRC:B3LYP/def2-TZVPP.
- Fig. S2 ..... SA2-CASSCF(8e, 7o)/ANO-RCC potential energy curves...
- Fig. S3 ..... Atom numbering for Tables S4 to S10.

**Table S1.** Vertical excitation (VE) energies in eV of the singlet and triplet states of isopropyl azide ( $C_s$ , MS-CASPT2).<sup>a,b</sup>

| <i>State</i>       | VE   | $f_{osc}^c$           | <i>Configuration</i> <sup>d</sup> | $W^e$ |
|--------------------|------|-----------------------|-----------------------------------|-------|
| 2 <sup>1</sup> A'  | 5.90 | 4.22 10 <sup>-4</sup> | $[n\pi]^1[\pi\sigma^*]^1$         | 39    |
|                    |      |                       | $[\pi(NNN)]^1[\pi^*(NNN)]^1$      | 48    |
| 1 <sup>1</sup> A'' | 4.49 | 8.47 10 <sup>-4</sup> | $[n\pi]^1[\pi^*(NNN)]^1$          | 89    |
| 2 <sup>1</sup> A'' | 7.26 | 7.12 10 <sup>-3</sup> | $[\pi(NNN)]^1[\pi\sigma^*]^1$     | 89    |
| SOC <sup>f</sup>   |      |                       |                                   |       |
| 1 <sup>3</sup> A'  | 4.68 | 0                     | $[n\pi]^1[\pi\sigma^*]^1$         | 75    |
|                    |      |                       | $[\pi(NNN)]^1[\pi^*(NNN)]^1$      | 15    |
| 2 <sup>3</sup> A'  | 5.38 | 0                     | $[n\pi]^1[\pi\sigma^*]^1$         | 15    |
|                    |      |                       | $[\pi(NNN)]^1[\pi^*(NNN)]^1$      | 73    |
| 1 <sup>3</sup> A'' | 4.19 | 16.82                 | $[n\pi]^1[\pi^*(NNN)]^1$          | 88    |
| 2 <sup>3</sup> A'' | 6.89 | 16.52                 | $[\pi(NNN)]^1[\pi\sigma^*]^1$     | 89    |

<sup>a</sup> $C_s$  MP2/def2-TZVPP optimized geometry. <sup>b</sup>SA2-CASSCF(14e, 12o)/ANO-RCC reference wave function, IPEA=0.25. Imaginary shift = 0.1. <sup>c</sup>Oscillator strength. <sup>d</sup>MS-CASPT2 main electronic configurations of the excited states referred to the ground state configuration. <sup>e</sup>Weight of the configuration in %. Only contributions greater than 15% are included. <sup>f</sup>Spin orbit coupling constant in cm<sup>-1</sup>.

**Table S2.** Vertical excitation (VE) energies in eV of the singlet and triplet states of isopropyl azide ( $C_s$ , MS-CASPT2).<sup>a,b</sup>

| <i>State</i>       | VE   | $f_{osc}^c$           | <i>Configuration</i> <sup>d</sup> | $W^e$ |
|--------------------|------|-----------------------|-----------------------------------|-------|
| 2 <sup>1</sup> A'  | 5.90 | 6.75 10 <sup>-4</sup> | $[n\pi]^1[\pi_{\sigma}^*]^1$      | 40    |
|                    |      |                       | $[\pi(NNN)]^1[\pi^*(NNN)]^1$      | 48    |
| 1 <sup>1</sup> A'' | 4.49 | 8.93 10 <sup>-4</sup> | $[n\pi]^1[\pi^*(NNN)]^1$          | 88    |
| 2 <sup>1</sup> A'' | 7.24 | 5.88 10 <sup>-3</sup> | $[\pi(NNN)]^1[\pi_{\sigma}^*]^1$  | 85    |
| SOC <sup>f</sup>   |      |                       |                                   |       |
| 1 <sup>3</sup> A'  | 4.66 | 0                     | $[n\pi]^1[\pi_{\sigma}^*]^1$      | 75    |
|                    |      |                       | $[\pi(NNN)]^1[\pi^*(NNN)]^1$      | 15    |
| 2 <sup>3</sup> A'  | 5.38 | 0                     | $[n\pi]^1[\pi_{\sigma}^*]^1$      | 15    |
|                    |      |                       | $[\pi(NNN)]^1[\pi^*(NNN)]^1$      | 75    |
| 1 <sup>3</sup> A'' | 4.18 | 16.22                 | $[n\pi]^1[\pi^*(NNN)]^1$          | 87    |
| 2 <sup>3</sup> A'' | 6.87 | 16.22                 | $[\pi(NNN)]^1[\pi_{\sigma}^*]^1$  | 86    |

<sup>a</sup> $C_s$  MP2/def2-TZVPP optimized geometry. <sup>b</sup>SA2-CASSCF(16e, 14o)/ANO-R reference wave function, IPEA=0.25. Imaginary shift = 0.1. <sup>c</sup>Oscillator strength. <sup>d</sup>MS-CASPT2 main electronic configurations of the excited states referred to the ground state configuration. <sup>e</sup>Weight of the configuration in %. Only contributions greater than 15% are included. <sup>f</sup>Spin orbit coupling constant in cm<sup>-1</sup>.

**Table S3.** Vertical excitation (VE) energies in eV of the singlet and triplet states of isopropyl azide ( $C_s$ , MS-CASPT2).<sup>a,b</sup>

| <i>State</i>       | VE   | $f_{osc}^c$           | <i>Configuration</i> <sup>d</sup> | $W^e$ |
|--------------------|------|-----------------------|-----------------------------------|-------|
| 2 <sup>1</sup> A'  | 5.92 | 4.52 10 <sup>-4</sup> | $[n\pi]^1[\pi\sigma^*]^1$         | 40    |
|                    |      |                       | $[\pi(NNN)]^1[\pi^*(NNN)]^1$      | 48    |
| 1 <sup>1</sup> A'' | 4.49 | 8.65 10 <sup>-4</sup> | $[n\pi]^1[\pi^*(NNN)]^1$          | 88    |
| 2 <sup>1</sup> A'' | 7.27 | 7.07 10 <sup>-3</sup> | $[\pi(NNN)]^1[\pi\sigma^*]^1$     | 85    |
| SOC <sup>f</sup>   |      |                       |                                   |       |
| 1 <sup>3</sup> A'  | 4.69 | 0                     | $[n\pi]^1[\pi\sigma^*]^1$         | 75    |
|                    |      |                       | $[\pi(NNN)]^1[\pi^*(NNN)]^1$      | 15    |
| 2 <sup>3</sup> A'  | 5.40 | 0                     | $[n\pi]^1[\pi\sigma^*]^1$         | 15    |
|                    |      |                       | $[\pi(NNN)]^1[\pi^*(NNN)]^1$      | 74    |
| 1 <sup>3</sup> A'' | 4.19 | 16.29                 | $[n\pi]^1[\pi^*(NNN)]^1$          | 88    |
| 2 <sup>3</sup> A'' | 6.90 | 16.23                 | $[\pi(NNN)]^1[\pi\sigma^*]^1$     | 87    |

<sup>a</sup> $C_s$  MP2/def2-TZVPP optimized geometry. <sup>b</sup>SA2-CASSCF(14e, 12o)/ANO-R reference wave function, IPEA=0.25. Imaginary shift = 0.1. <sup>c</sup>Oscillator strength. <sup>d</sup>MS-CASPT2 main electronic configurations of the excited states referred to the ground state configuration. <sup>e</sup>Weight of the configuration in %. Only contributions greater than 15% are included. <sup>f</sup>Spin orbit coupling constant in cm<sup>-1</sup>.

**Table S4.** Internal coordinates of the species represented in Figure 3.

| Coordinate | M0     | M1     | TS1    | TS0    | ISC1   |
|------------|--------|--------|--------|--------|--------|
| R2,1       | 1.519  | 1.499  | 1.488  | 1.448  | 1.445  |
| R3,1       | 1.102  | 1.106  | 1.110  | 1.125  | 1.124  |
| A3,1,2     | 102.1  | 102.6  | 102.5  | 91.6   | 91.4   |
| R4,1       | 1.521  | 1.524  | 1.525  | 1.524  | 1.525  |
| A4,1,2     | 111.4  | 111.3  | 111.7  | 116.1  | 116.2  |
| Dh4,1,2,3  | 116.1  | 116.1  | 115.8  | 111.5  | 111.5  |
| R5,1       | 1.521  | 1.524  | 1.525  | 1.524  | 1.525  |
| A5,1,2     | 111.4  | 111.3  | 111.7  | 116.1  | 116.2  |
| Dh5,1,2,3  | -116.1 | -116.1 | -115.8 | -111.5 | -111.5 |
| R6,4       | 1.084  | 1.082  | 1.082  | 1.085  | 1.086  |
| A6,4,1     | 111.3  | 111.4  | 111.3  | 110.3  | 110.4  |
| Dh6,4,1,2  | 66.8   | 69.2   | 71.6   | 75.1   | 75.7   |
| R7,5       | 1.084  | 1.082  | 1.082  | 1.085  | 1.086  |
| A7,5,1     | 111.3  | 111.4  | 111.3  | 110.3  | 110.4  |
| Dh7,5,1,6  | 35.8   | 34.2   | 33.0   | 37.8   | 37.6   |
| R8,4       | 1.083  | 1.083  | 1.083  | 1.084  | 1.084  |
| A8,4,1     | 110.1  | 109.5  | 109.6  | 111.3  | 111.3  |
| Dh8,4,1,6  | 119.5  | 119.7  | 119.8  | 119.2  | 119.2  |
| R9,5       | 1.083  | 1.083  | 1.083  | 1.084  | 1.084  |
| A9,5,1     | 110.1  | 109.5  | 109.6  | 111.3  | 111.3  |
| Dh9,5,1,7  | -119.5 | -119.7 | -119.8 | -119.2 | -119.2 |
| R10,4      | 1.082  | 1.083  | 1.083  | 1.081  | 1.081  |
| A10,4,1    | 110.8  | 111.0  | 111.0  | 110.6  | 110.6  |
| Dh10,4,1,6 | -120.7 | -121.0 | -121.0 | -119.7 | -119.7 |
| R11,5      | 1.082  | 1.083  | 1.083  | 1.081  | 1.081  |
| A11,5,1    | 110.8  | 111.0  | 111.0  | 110.6  | 110.6  |
| Dh11,5,1,7 | 120.7  | 121.0  | 121.0  | 119.7  | 119.7  |
| R12,2      | 1.241  | 1.463  | 1.651  | 1.876  | 1.889  |
| A12,2,1    | 114.2  | 108.0  | 106.2  | 105.0  | 104.4  |
| Dh12,2,1,3 | 180.0  | 180.0  | 180.0  | 180.0  | 180.0  |
| R13,12     | 1.141  | 1.188  | 1.159  | 1.105  | 1.104  |
| A13,12,2   | 173.3  | 119.6  | 117.8  | 160.3  | 164.1  |
| Dh13,12,2, | 180.0  | 180.0  | 180.0  | 180.0  | 180.0  |

<sup>a</sup>CASSCF(16e, 14o)/ANO-RCC optimized geometry. R in Å; A and Dh in degrees. Numbering in Fig. S3.

**Table S5.** Internal coordinates of the species represented in Figure 3.

| Coordinate | M0     | M1     | TS1    | TS0    | ISC1   |
|------------|--------|--------|--------|--------|--------|
| R2,1       | 1.517  | 1.498  | 1.488  | 1.447  | 1.449  |
| R3,1       | 1.103  | 1.107  | 1.111  | 1.127  | 1.123  |
| A3,1,2     | 102.1  | 102.7  | 102.5  | 91.3   | 92.1   |
| R4,1       | 1.521  | 1.524  | 1.525  | 1.524  | 1.525  |
| A4,1,2     | 111.4  | 111.3  | 111.7  | 116.2  | 116.1  |
| Dh4,1,2,3  | 116.1  | 116.0  | 115.7  | 111.4  | 111.7  |
| R5,1       | 1.521  | 1.524  | 1.525  | 1.524  | 1.525  |
| A5,1,2     | 111.4  | 111.3  | 111.7  | 116.2  | 116.1  |
| Dh5,1,2,3  | -116.1 | -116.0 | -115.7 | -111.4 | -111.7 |
| R6,4       | 1.085  | 1.083  | 1.083  | 1.086  | 1.086  |
| A6,4,1     | 111.3  | 111.4  | 111.3  | 110.3  | 110.4  |
| Dh6,4,1,2  | 66.9   | 69.2   | 70.1   | 75.7   | 75.4   |
| R7,5       | 1.085  | 1.083  | 1.083  | 1.086  | 1.086  |
| A7,5,1     | 111.3  | 111.4  | 111.3  | 110.3  | 110.4  |
| Dh7,5,1,6  | 35.8   | 34.2   | 34.1   | 37.6   | 37.4   |
| R8,4       | 1.084  | 1.084  | 1.084  | 1.085  | 1.085  |
| A8,4,1     | 110.1  | 109.6  | 109.6  | 111.3  | 111.2  |
| Dh8,4,1,6  | 119.4  | 119.7  | 119.7  | 119.2  | 119.2  |
| R9,5       | 1.084  | 1.084  | 1.084  | 1.085  | 1.085  |
| A9,5,1     | 110.1  | 109.6  | 109.6  | 111.3  | 111.2  |
| Dh9,5,1,7  | -119.4 | -119.7 | -119.7 | -119.2 | -119.2 |
| R10,4      | 1.083  | 1.084  | 1.084  | 1.082  | 1.082  |
| A10,4,1    | 110.8  | 111.0  | 111.0  | 110.6  | 110.6  |
| Dh10,4,1,6 | -120.7 | -121.0 | -120.9 | -119.7 | -119.8 |
| R11,5      | 1.083  | 1.084  | 1.084  | 1.082  | 1.082  |
| A11,5,1    | 110.8  | 111.0  | 111.0  | 110.6  | 110.6  |
| Dh11,5,1,7 | 120.7  | 121.0  | 120.9  | 119.7  | 119.8  |
| R12,2      | 1.241  | 1.457  | 1.660  | 1.887  | 1.883  |
| A12,2,1    | 114.3  | 108.1  | 106.1  | 105.1  | 104.4  |
| Dh12,2,1,3 | 180.0  | 180.0  | 180.0  | 180.0  | 180.0  |
| R13,12     | 1.141  | 1.189  | 1.158  | 1.106  | 1.105  |
| A13,12,2   | 173.3  | 119.8  | 117.8  | 159.3  | 163.2  |
| Dh13,12,2, | 180.0  | 180.0  | 180.0  | 180.0  | 180.0  |

<sup>a</sup>CASSCF(16e, 14o)/ANO-R optimized geometry. R in Å; A and Dh in degrees. Numbering in Fig. S3.

**Table S6.** Internal coordinates of the species represented in Figure 3.

| Coordinate | M0     | M1     | TS1    | TS0    | ISC1   |
|------------|--------|--------|--------|--------|--------|
| R2,1       | 1.522  | 1.502  | 1.493  | 1.454  | 1.464  |
| R3,1       | 1.079  | 1.082  | 1.085  | 1.098  | 1.095  |
| A3,1,2     | 102.1  | 102.7  | 102.4  | 93.5   | 94.9   |
| R4,1       | 1.521  | 1.524  | 1.525  | 1.525  | 1.525  |
| A4,1,2     | 111.2  | 111.1  | 111.5  | 115.6  | 115.1  |
| Dh4,1,2,3  | 116.4  | 116.4  | 116.1  | 112.5  | 113.0  |
| R5,1       | 1.521  | 1.524  | 1.525  | 1.525  | 1.525  |
| A5,1,2     | 111.2  | 111.1  | 111.5  | 115.6  | 115.1  |
| Dh5,1,2,3  | -116.4 | -116.4 | -116.1 | -112.5 | -113.0 |
| R6,4       | 1.084  | 1.082  | 1.082  | 1.085  | 1.085  |
| A6,4,1     | 111.4  | 111.4  | 111.4  | 110.5  | 110.6  |
| Dh6,4,1,2  | 66.5   | 69.0   | 69.8   | 74.3   | 73.5   |
| R7,5       | 1.084  | 1.082  | 1.082  | 1.085  | 1.085  |
| A7,5,1     | 111.4  | 111.4  | 111.4  | 110.5  | 110.6  |
| Dh7,5,1,6  | 35.6   | 34.0   | 33.9   | 37.1   | 36.9   |
| R8,4       | 1.084  | 1.083  | 1.083  | 1.084  | 1.084  |
| A8,4,1     | 110.0  | 109.5  | 109.6  | 111.1  | 111.1  |
| Dh8,4,1,6  | 119.5  | 119.7  | 119.8  | 119.3  | 119.3  |
| R9,5       | 1.084  | 1.083  | 1.083  | 1.084  | 1.084  |
| A9,5,1     | 110.0  | 109.5  | 109.6  | 111.1  | 111.1  |
| Dh9,5,1,7  | -119.5 | -119.7 | -119.8 | -119.3 | -119.3 |
| R10,4      | 1.082  | 1.083  | 1.083  | 1.081  | 1.082  |
| A10,4,1    | 110.8  | 111.0  | 111.0  | 110.6  | 110.6  |
| Dh10,4,1,6 | -120.7 | -121.1 | -121.0 | -119.8 | -119.9 |
| R11,5      | 1.082  | 1.083  | 1.083  | 1.081  | 1.082  |
| A11,5,1    | 110.8  | 111.0  | 111.0  | 110.6  | 110.6  |
| Dh11,5,1,7 | 120.7  | 121.1  | 121.0  | 119.8  | 119.9  |
| R12,2      | 1.240  | 1.460  | 1.658  | 1.909  | 1.865  |
| A12,2,1    | 114.2  | 108.1  | 106.1  | 104.6  | 104.7  |
| Dh12,2,1,3 | 180.0  | 180.0  | 180.0  | 180.0  | 180.0  |
| R13,12     | 1.141  | 1.188  | 1.158  | 1.104  | 1.105  |
| A13,12,2   | 173.2  | 119.7  | 117.9  | 159.4  | 158.0  |
| Dh13,12,2, | 180.0  | 180.0  | 180.0  | 180.0  | 180.0  |

<sup>a</sup>CASSCF(14e, 12o)/ANO-RCC optimized geometry. R in Å; A and Dh in degrees. Numbering in Fig. S3.



**Table S7.** Internal coordinates of the species represented in Figure 3.

| Coordinate | M0     | M1     | TS1    | TS0    | ISC1   |
|------------|--------|--------|--------|--------|--------|
| R2,1       | 1.520  | 1.502  | 1.492  | 1.454  | 1.466  |
| R3,1       | 1.080  | 1.083  | 1.086  | 1.098  | 1.096  |
| A3,1,2     | 102.1  | 102.7  | 102.4  | 93.5   | 95.2   |
| R4,1       | 1.521  | 1.524  | 1.525  | 1.525  | 1.525  |
| A4,1,2     | 111.2  | 111.1  | 111.5  | 115.6  | 115.1  |
| Dh4,1,2,3  | 116.4  | 116.3  | 116.0  | 112.5  | 113.1  |
| R5,1       | 1.521  | 1.524  | 1.525  | 1.525  | 1.525  |
| A5,1,2     | 111.2  | 111.1  | 111.5  | 115.6  | 115.1  |
| Dh5,1,2,3  | -116.4 | -116.3 | -116.0 | -112.5 | -113.1 |
| R6,4       | 1.085  | 1.083  | 1.083  | 1.085  | 1.086  |
| A6,4,1     | 111.4  | 111.4  | 111.4  | 110.5  | 110.7  |
| Dh6,4,1,2  | 66.6   | 68.9   | 69.9   | 74.3   | 73.4   |
| R7,5       | 1.085  | 1.083  | 1.083  | 1.085  | 1.086  |
| A7,5,1     | 111.4  | 111.4  | 111.4  | 110.5  | 110.7  |
| Dh7,5,1,6  | 35.6   | 34.0   | 33.9   | 37.1   | 36.8   |
| R8,4       | 1.084  | 1.084  | 1.084  | 1.084  | 1.085  |
| A8,4,1     | 110.0  | 109.5  | 109.6  | 111.1  | 111.0  |
| Dh8,4,1,6  | 119.4  | 119.7  | 119.8  | 119.3  | 119.3  |
| R9,5       | 1.084  | 1.084  | 1.084  | 1.084  | 1.085  |
| A9,5,1     | 110.0  | 109.5  | 109.6  | 111.1  | 111.0  |
| Dh9,5,1,7  | -119.4 | -119.7 | -119.8 | -119.3 | -119.3 |
| R10,4      | 1.083  | 1.084  | 1.084  | 1.081  | 1.082  |
| A10,4,1    | 110.8  | 111.0  | 111.0  | 110.6  | 110.6  |
| Dh10,4,1,6 | -120.7 | -121.1 | -121.0 | -119.8 | -119.9 |
| R11,5      | 1.083  | 1.084  | 1.084  | 1.081  | 1.082  |
| A11,5,1    | 110.8  | 111.0  | 111.0  | 110.6  | 110.6  |
| Dh11,5,1,7 | 120.7  | 121.1  | 121.0  | 119.8  | 119.9  |
| R12,2      | 1.240  | 1.454  | 1.667  | 1.909  | 1.863  |
| A12,2,1    | 114.3  | 108.2  | 106.0  | 104.6  | 104.7  |
| Dh12,2,1,3 | 180.0  | 180.0  | 180.0  | 180.0  | 180.0  |
| R13,12     | 1.141  | 1.189  | 1.157  | 1.104  | 1.106  |
| A13,12,2   | 173.2  | 119.9  | 117.9  | 159.4  | 157.2  |
| Dh13,12,2, | 180.0  | 180.0  | 180.0  | 180.0  | 180.0  |

<sup>a</sup>CASSCF(14e, 12o)/ANO-R optimized geometry. R in Å; A and Dh in degrees. Numbering in Fig. S3.

**Table S8.** Internal coordinates of the nitrene species represented in Figure 3.

| Coordinate | Nitrene T0 | Nitrene S0 | Nitrene S1 |
|------------|------------|------------|------------|
| R2,1       | 1.472      | 1.445      | 1.448      |
| R3,1       | 1.113      | 1.120      | 1.116      |
| A3,1,2     | 106.0      | 106.0      | 104.5      |
| R4,1       | 1.525      | 1.529      | 1.530      |
| A4,1,2     | 109.8      | 110.4      | 110.8      |
| Dh4,1,2,3  | 117.4      | 117.0      | 116.7      |
| R5,1       | 1.525      | 1.529      | 1.530      |
| A5,1,2     | 109.8      | 110.4      | 110.8      |
| Dh5,1,2,3  | -117.4     | -117.0     | -116.7     |
| R6,4       | 1.084      | 1.083      | 1.083      |
| A6,4,1     | 110.7      | 110.6      | 110.5      |
| Dh6,4,1,2  | 63.7       | 64.4       | 64.7       |
| R7,5       | 1.084      | 1.083      | 1.083      |
| A7,5,1     | 110.7      | 110.6      | 110.5      |
| Dh7,5,1,6  | 35.4       | 35.8       | 36.2       |
| R8,4       | 1.083      | 1.083      | 1.083      |
| A8,4,1     | 110.4      | 110.1      | 110.2      |
| Dh8,4,1,6  | 119.8      | 119.8      | 119.7      |
| R9,5       | 1.083      | 1.083      | 1.083      |
| A9,5,1     | 110.4      | 110.1      | 110.2      |
| Dh9,5,1,7  | -119.8     | -119.8     | -119.7     |
| R10,4      | 1.083      | 1.082      | 1.082      |
| A10,4,1    | 111.0      | 110.9      | 110.9      |
| Dh10,4,1,6 | -120.2     | -120.2     | -120.1     |
| R11,5      | 1.083      | 1.082      | 1.082      |
| A11,5,1    | 111.0      | 110.9      | 110.9      |
| Dh11,5,1,7 | 120.2      | 120.2      | 120.1      |

<sup>a</sup>CASSCF(8e, 7o)/ANO-RCC optimized geometry. R in Å; A and Dh in degrees. Numbering of atoms in Fig. S3.

**Table S9.** Set of nonredundant internal coordinates of isopropyl azide.<sup>a</sup>

| N° | Symbol                                | Definition                                                                                                                   | Description                     |
|----|---------------------------------------|------------------------------------------------------------------------------------------------------------------------------|---------------------------------|
| 1  | v(NN)                                 | $R_{2,12}$                                                                                                                   | N-N <sub>w</sub> stretching     |
| 2  | v(NN)                                 | $R_{12,13}$                                                                                                                  | N-N stretching                  |
| 3  | v(CN)                                 | $R_{1,2}$                                                                                                                    | C-N stretching                  |
| 4  | v(CH)                                 | $R_{1,3}$                                                                                                                    | C-H <sub>α</sub> stretching     |
| 5  | v(CC)                                 | $\frac{1}{\sqrt{2}}(R_{1,4} - R_{1,5})$                                                                                      | C-C stretching                  |
| 6  | v(CC)                                 | $\frac{1}{\sqrt{2}}(R_{1,4} + R_{1,5})$                                                                                      | C-C stretching                  |
| 7  | v <sub>as</sub> (CH <sub>2</sub> )    | $\frac{1}{\sqrt{2}}(R_{4,6} - R_{4,8})$                                                                                      | CH <sub>2</sub> asym stretching |
| 8  | v <sub>as</sub> (CH <sub>3</sub> )    | $\frac{1}{\sqrt{6}}(2R_{4,10} - R_{4,6} - R_{4,8})$                                                                          | CH <sub>3</sub> asym stretching |
| 9  | v <sub>s</sub> (CH <sub>3</sub> )     | $\frac{1}{\sqrt{3}}(R_{4,10} + R_{4,6} + R_{4,8})$                                                                           | CH <sub>3</sub> sym stretching  |
| 10 | v <sub>as</sub> (CH <sub>2</sub> )    | $\frac{1}{\sqrt{2}}(R_{5,7} - R_{5,9})$                                                                                      | CH <sub>2</sub> asym stretching |
| 11 | v <sub>as</sub> (CH <sub>3</sub> )    | $\frac{1}{\sqrt{6}}(2R_{5,11} - R_{5,7} - R_{5,9})$                                                                          | CH <sub>3</sub> asym stretching |
| 12 | v <sub>s</sub> (CH <sub>3</sub> )     | $\frac{1}{\sqrt{3}}(R_{5,11} + R_{5,7} + R_{5,9})$                                                                           | CH <sub>3</sub> sym stretching  |
| 13 | δ(CCH)                                | $\alpha_{2,3}^1$                                                                                                             | CCH <sub>α</sub> def            |
| 14 | δ <sub>sym</sub> (CH <sub>3</sub> )   | $\frac{1}{\sqrt{6}}(\alpha_{4,10}^4 + \alpha_{6,8}^4 + \alpha_{6,10}^4 - \alpha_{6,1}^4 - \alpha_{10,1}^4 - \alpha_{8,1}^4)$ | CH <sub>3</sub> sym def         |
| 15 | δ <sub>asym</sub> (CH <sub>3</sub> )  | $\frac{1}{\sqrt{6}}(2\alpha_{8,10}^4 - \alpha_{6,8}^4 - \alpha_{6,10}^4)$                                                    | CH <sub>3</sub> asym def        |
| 16 | δ' <sub>asym</sub> (CH <sub>3</sub> ) | $\frac{1}{\sqrt{2}}(\alpha_{6,10}^4 - \alpha_{6,8}^4)$                                                                       | CH <sub>3</sub> asym def        |
| 17 | δ <sub>rock</sub> (CH <sub>3</sub> )  | $\frac{1}{\sqrt{6}}(2\alpha_{6,1}^4 - \alpha_{10,1}^4 - \alpha_{8,1}^4)$                                                     | CH <sub>3</sub> rocking         |
| 18 | δ' <sub>rock</sub> (CH <sub>3</sub> ) | $\frac{1}{\sqrt{2}}(\alpha_{10,1}^4 - \alpha_{8,1}^4)$                                                                       | CH <sub>3</sub> rocking         |
| 19 | δ <sub>sym</sub> (CH <sub>3</sub> )   | $\frac{1}{\sqrt{6}}(\alpha_{5,11}^5 + \alpha_{7,9}^5 + \alpha_{7,11}^5 - \alpha_{7,1}^5 - \alpha_{11,1}^5 - \alpha_{9,1}^5)$ | CH <sub>3</sub> sym def         |
| 20 | δ <sub>asym</sub> (CH <sub>3</sub> )  | $\frac{1}{\sqrt{6}}(2\alpha_{9,11}^5 - \alpha_{7,9}^5 - \alpha_{7,11}^5)$                                                    | CH <sub>3</sub> asym def        |
| 21 | δ' <sub>asym</sub> (CH <sub>3</sub> ) | $\frac{1}{\sqrt{2}}(\alpha_{7,11}^5 - \alpha_{7,9}^5)$                                                                       | CH <sub>3</sub> asym def        |
| 22 | δ <sub>rock</sub> (CH <sub>3</sub> )  | $\frac{1}{\sqrt{6}}(2\alpha_{7,1}^5 - \alpha_{11,1}^5 - \alpha_{9,1}^5)$                                                     | CH <sub>3</sub> rocking         |
| 23 | δ' <sub>rock</sub> (CH <sub>3</sub> ) | $\frac{1}{\sqrt{2}}(\alpha_{11,1}^5 - \alpha_{9,1}^5)$                                                                       | CH <sub>3</sub> rocking         |
| 24 | δ(CCH)                                | $\frac{1}{\sqrt{2}}(\alpha_{3,4}^1 - \alpha_{3,5}^1)$                                                                        | CCH def                         |
| 25 | δ(CNN)                                | $\alpha_{1,12}^2$                                                                                                            | CNN def                         |

|    |                       |                      |                                  |
|----|-----------------------|----------------------|----------------------------------|
| 26 | $\delta(\text{NNN})$  | $\alpha_{2,13}^{12}$ | NNN def                          |
| 27 | $\delta(\text{CCC})$  | $\alpha_{5,4}^1$     | CCC def                          |
| 28 | $\delta(\text{CCN})$  | $\alpha_{4,2}^1$     | CCN def                          |
| 29 | $\delta(\text{CCN})$  | $\alpha_{5,2}^1$     | CCN def                          |
| 30 | $\Gamma(\text{CN})$   | $\Gamma_{1-2}$       | torsion of N-N <sub>2</sub> bond |
| 31 | $\Gamma(\text{CC})$   | $\Gamma_{1-2}$       | torsion of C-N bond              |
| 32 | $\Gamma(\text{CS})$   | $\Gamma_{1-4}$       | torsion of CH <sub>3</sub>       |
| 33 | $\Gamma(\text{CH}_3)$ | $\Gamma_{1-5}$       | torsion of CH <sub>3</sub>       |

<sup>a</sup>Atom numbering in Figure S3.

**Table S10a.** Assignment of the calculated fundamental modes of TS1.<sup>a</sup>

| TS1 <sup>b</sup> | PED <sup>c</sup>            | TS1 <sup>d</sup> | PED <sup>c</sup>                  | Assignment                       |
|------------------|-----------------------------|------------------|-----------------------------------|----------------------------------|
| 3240             | 48(8)+48(11)                | 3239             | 48(8)+48(11)                      | CH <sub>3</sub> asym stretching  |
| 3238             | 48(8)+48(11)                | 3236             | 48(8)+48(11)                      | CH <sub>3</sub> asym stretching  |
| 3210             | 49(7)+49(10)                | 3211             | 49(7)+49(10)                      | CH <sub>2</sub> asym stretching  |
| 3201             | 49(7)+49(10)                | 3201             | 49(7)+49(10)                      | CH <sub>2</sub> asym stretching  |
| 3156             | 47(9)+47(12)                | 3155             | 47(9)+47(12)                      | CH <sub>3</sub> sym stretching   |
| 3149             | 47(9)+47(12)                | 3148             | 47(9)+47(12)                      | CH <sub>3</sub> sym stretching   |
| 2795             | 99(4)                       | 3065             | 98(4)                             | C-H $\alpha$ stretching          |
| 2301             | 99(2)                       | 2312             | 99(2)                             | N-N stretching                   |
| 1618             | 23(15)+23(16)+23(20)+23(21) | 1619             | 19(15)+27(16)+19(20)+27(21)       | CH <sub>3</sub> asym def         |
| 1612             | 23(15)+23(16)+23(20)+23(21) | 1613             | 27(15)+19(16)+27(20)+19(21)       | CH <sub>3</sub> asym def         |
| 1602             | 38(16)+38(21)               | 1601             | 39(16)+39(21)                     | CH <sub>3</sub> asym def         |
| 1599             | 38(15)+38(20)               | 1599             | 39(15)+39(20)                     | CH <sub>3</sub> asym def         |
| 1537             | 46(14)+46(19)               | 1537             | 46(14)+46(19)                     | CH <sub>3</sub> sym def          |
| 1523             | 44(14)+44(19)               | 1522             | 44(14)+44(19)                     | CH <sub>3</sub> sym def          |
| 1370             | 20(3)+29(13)                | 1413             | 16(3)+47(13)                      | CCH $\alpha$ def                 |
| 1354             | 21(5)+50(24)                | 1396             | 13(5)+64(24)                      | CCH def                          |
| 1286             | 29(17)+29(22)+11(28)        | 1294             | 11(6)+22(17)+22(22)+16(27)        | CCN def                          |
| 1211             | 30(5)+11(18)+11(23)+16(24)  | 1221             | 38(5)+12(18)+12(23)+10(28)+10(25) | CCH def                          |
| 1113             | 28(13)+22(18)+22(23)        | 1130             | 29(13)+21(18)+21(23)              | CH <sub>3</sub> rocking          |
| 1005             | 37(5)+28(18)+28(23)         | 1006             | 33(5)+22(18)+22(23)               | CH <sub>3</sub> rocking          |
| 986              | 33(17)+33(22)+25(24)        | 993              | 29(17)+29(22)+18(24)              | CH <sub>3</sub> rocking          |
| 941              | 17(3)+32(6)+25(13)          | 958              | 26(3)+33(6)+16(13)                | C-C stretching                   |
| 783              | 46(3)+35(6)+14(13)          | 790              | 49(3)+36(6)                       | C-C stretching                   |
| 568              | 24(25)+22(28)+22(29)        | 577              | 24(25)+22(28)+22(29)              | CCN def                          |
| 479              | 44(28)+44(29)               | 476              | 44(28)+44(29)                     | CCN def                          |
| 398              | 73(27)                      | 399              | 72(27)                            | CCC def                          |
| 279              | 22(25)+24(26)+15(32)+15(33) | 276              | 21(25)+18(26)+22(32)+22(33)       | CNN + NNN def                    |
| 252              | 14(26)+27(32)+27(33)        | 253              | 19(26)+21(32)+21(33)              | torsion of CH <sub>3</sub>       |
| 242              | 59(30)+20(31)               | 232              | 34(30)+14(31)+18(32)+18(33)       | torsion of N-N <sub>2</sub> bond |
| 220              | 47(32)+47(33)               | 220              | 20(30)+37(32)+37(33)              | torsion of CH <sub>3</sub>       |
| 114              | 45(25)+45(26)               | 113              | 45(25)+46(26)                     | CNN + NNN def                    |
| 86               | 39(30)+58(31)               | 85               | 39(30)+60(31)                     | torsion of C-N bond              |
| <b>421 i</b>     | 60(1)+13(3)+11(13)+8(25)    | <b>369 i</b>     | 68(1)+11(3)+6(13)+8(25)           |                                  |

<sup>a</sup>Assignment of vibrational modes according to the set of internal coordinates given in Table S9. <sup>b</sup>Frequencies of TS1 in  $\text{cm}^{-1}$  [CASSCF(16e,14o)]. <sup>c</sup>Weight of the potential energy distribution; in parenthesis: coordinate number. <sup>d</sup>Frequencies of TS1 in  $\text{cm}^{-1}$  CASSCF(14e,12o).

**Table S10b.** Assignment of the calculated fundamental modes of TSx.<sup>a</sup>

| TSx <sup>b</sup> | PED <sup>c</sup>           | TSx <sup>d</sup> | PED <sup>c</sup>                  | Assignment                       |
|------------------|----------------------------|------------------|-----------------------------------|----------------------------------|
| 3124             | 48(8)+48(11)               | 3191             | 47(8)+47(11)                      | CH <sub>3</sub> asym stretching  |
| 3123             | 48(8)+48(11)               | 3190             | 47(8)+47(11)                      | CH <sub>3</sub> asym stretching  |
| 3089             | 48(7)+48(10)               | 3155             | 47(7)+47(10)                      | CH <sub>2</sub> asym stretching  |
| 3082             | 48(7)+48(10)               | 3150             | 48(7)+48(10)                      | CH <sub>2</sub> asym stretching  |
| 3029             | 47(9)+47(12)               | 3070             | 48(9)+48(12)                      | CH <sub>3</sub> sym stretching   |
| 3023             | 47(9)+47(12)               | 3066             | 48(9)+48(12)                      | CH <sub>3</sub> sym stretching   |
| 2705             | 99(4)                      | 2762             | 99(4)                             | C-H $\alpha$ stretching          |
| 2366             | 99(2)                      | 2116             | 92(2)                             | N-N stretching                   |
| 1498             | 38(15)+38(20)              | 1511             | 24(15)+21(16)+24(20)+21(21)       | CH <sub>3</sub> asym def         |
| 1494             | 37(16)+37(21)              | 1508             | 22(15)+21(16)+22(20)+21(21)       | CH <sub>3</sub> asym def         |
| 1479             | 46(15)+46(20)              | 1490             | 40(15)+40(20)                     | CH <sub>3</sub> asym def         |
| 1477             | 46(16)+46(21)              | 1490             | 39(16)+39(21)                     | CH <sub>3</sub> asym def         |
| 1404             | 47(14)+47(19)              | 1403             | 47(14)+47(19)                     | CH <sub>3</sub> sym def          |
| 1386             | 47(14)+47(19)              | 1390             | 44(14)+44(19)                     | CH <sub>3</sub> sym def          |
| 1335             | 43(3)+11(6)+14(25)         | 1374             | 45(3)+12(6)+13(27)                | CCH $\alpha$ def                 |
| 1182             | 34(5)+14(24)+15(28)+15(29) | 1219             | 39(5)+13(24)+14(28)+14(29)        | CCH def                          |
| 1167             | 34(17)+34(22)              | 1175             | 33(17)+33(21)                     | CCN def                          |
| 1079             | 13(17)+13(22)+53(2)        | 1093             | 12(17)+12(22)+57(24)              | CCH def                          |
| 1056             | 18(3)+33(18)+33(23)        | 1068             | 14(3)+34(18)+34(23)               | CH <sub>3</sub> rocking          |
| 915              | 32(5)+21(18)+21(23)        | 931              | 32(5)+30(18)+30(23)               | CH <sub>3</sub> rocking          |
| 897              | 23(17)+23(22)+25(2)        | 900              | 29(17)+29(22)+29(24)              | CH <sub>3</sub> rocking          |
| 829              | 44(6)+25(13)+11(17)+11(22) | 839              | 70(6)+10(13)                      | C-C stretching                   |
| 721              | 14(3)+36(13)               | 698              | 13(3)+13(6)+39(13)                | C-C stretching                   |
| 503              | 16(25)+20(28)+20(2)        | 508              | 11(3)+23(13)+16(29)+19(28)+19(29) | CCN def                          |
| 491              | 43(28)+43(29)              | 502              | 42(28)+42(29)                     | CCN def                          |
| 378              | 72(27)                     | 376              | 72(27)                            | CCC def                          |
| 255              | 24(25)+34(26)              | 259              | 21(25)+18(26)+23(32)+23(33)       | CNN + NNN def                    |
| 242              | 12(28)+12(29)+48(30)+20(3) | 244              | 14(28)+14(29)+41(30)+23(31)       | torsion of CH <sub>3</sub>       |
| 219              | 20(26)+29(32)+29(3)        | 225              | 25(26)+ 20(32)+20(33)             | torsion of N-N <sub>2</sub> bond |
| 182              | 43(32)+43(33)              | 187              | 42(32)+42(33)                     | torsion of CH <sub>3</sub>       |
| 118              | 53(32)+30(33)              | 109              | 49(25)+33(26)                     | CNN + NNN def                    |
| 75               | 46(30)+51(31)              | 77               | 47(30)+48(31)                     | torsion of C-N bond              |
| <b>418 i</b>     | 14(1)+18(3)+39(13)         | <b>604 i</b>     | 16(1)+17(3)+10(4)+38(13)          |                                  |

<sup>a</sup>Assignment of vibrational modes according to the set of internal coordinates given in Table S9. <sup>b</sup>Frequencies of TSx in cm<sup>-1</sup> [B3LYP/def2-TZVPP]. <sup>c</sup>Weight of the potential energy distribution; in parenthesis: coordinate number. <sup>d</sup>Frequencies of TSx in cm<sup>-1</sup> MP2/def2-TZVPP.

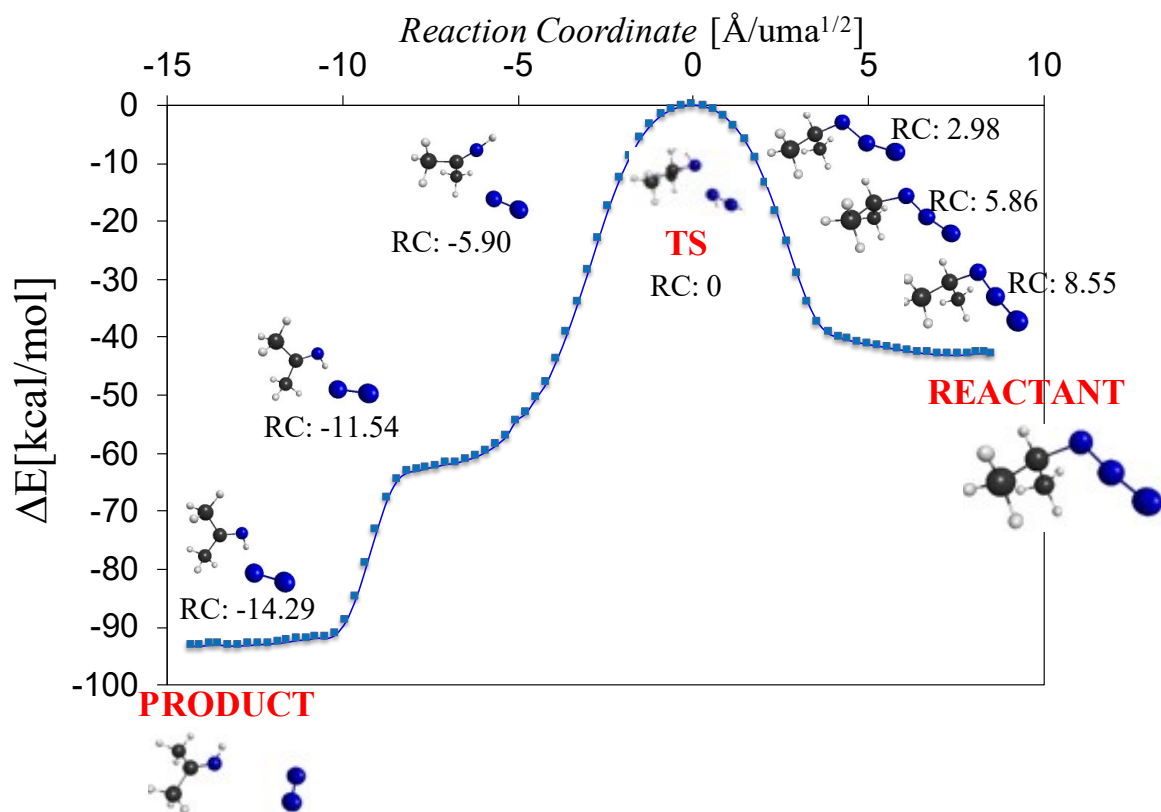

**Fig. S1** Intrinsic reaction coordinate connecting reactant and products via the transition state TSx. IRC:B3LYP/def2-TZVPP.

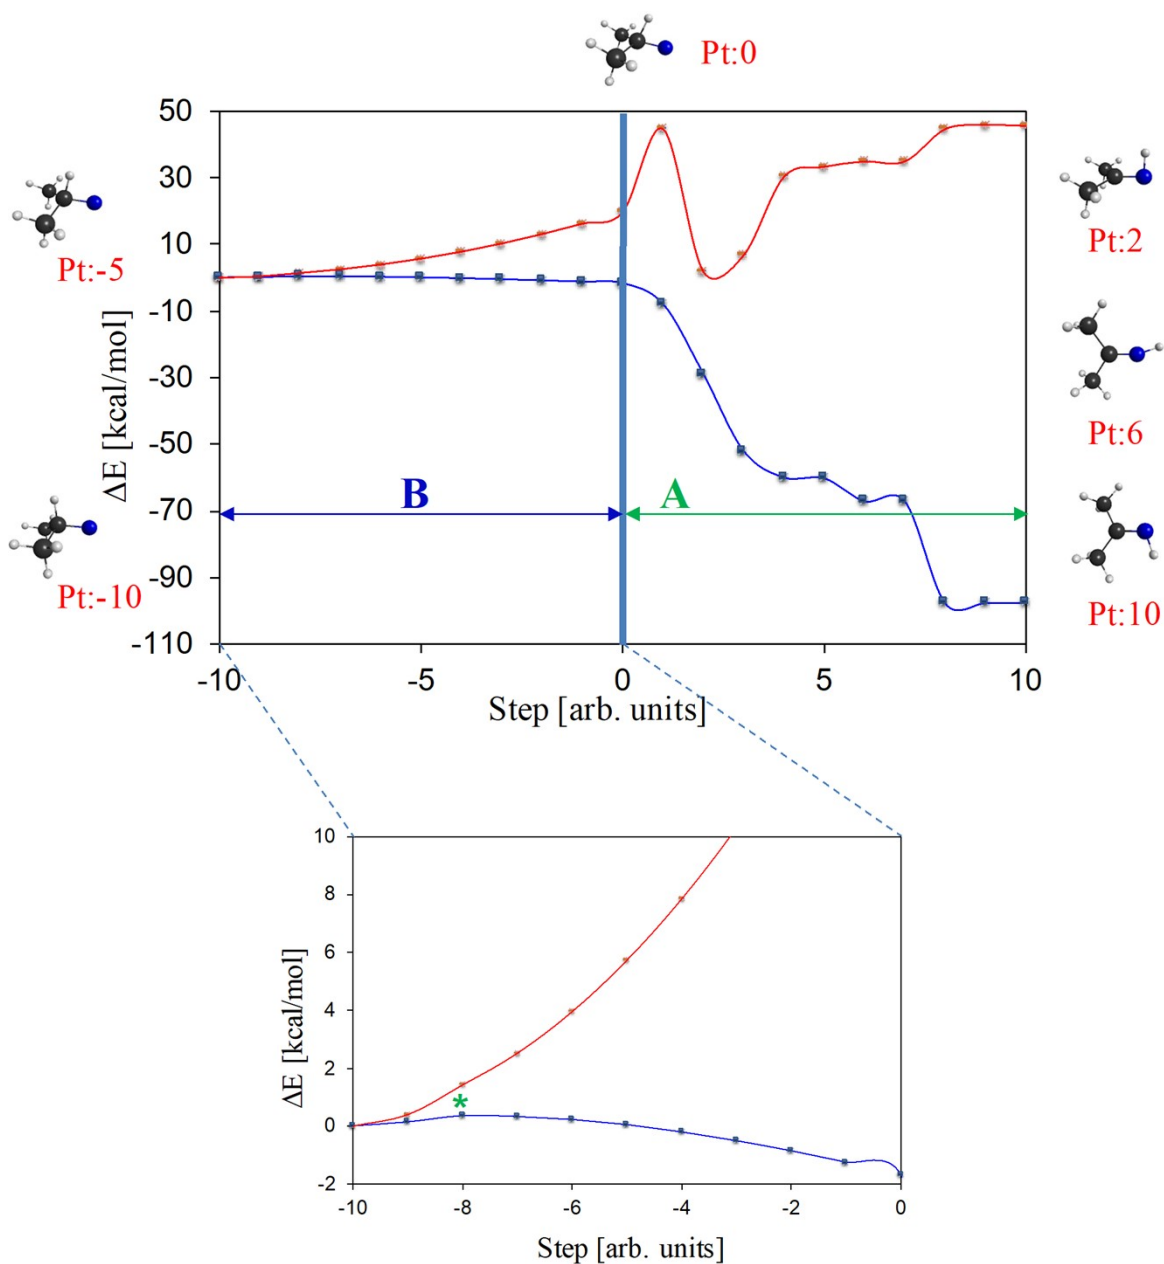

**Fig. S2** SA2-CASSCF(8e, 7o)/ANO-RCC potential energy curves of the two low-lying singlet states of isopropyl nitrene leading to isomerization into imine. **A** section: energy profile obtained from the geometries of the IRC [dissociative direction] represented in Fig. S1(b) after removing the  $N_2$  fragment. **B** section: linear interpolation starting at the  $1^1A'$  minimum of isopropyl nitrene and ending at the first point of A section.



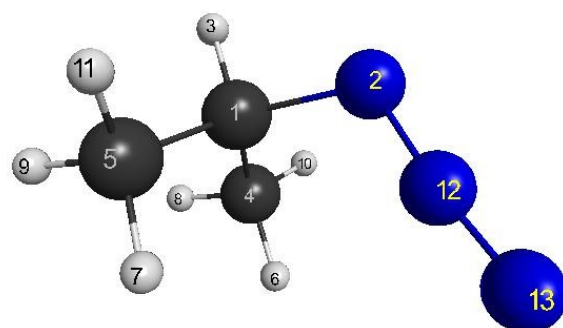

**Fig S3** Atom numbering for Tables S4 to S10.
